# Supplementary material
Source: HighWire-hosted journal article supplement (https://ejhp.bmj.com/highwire/filestream/150629/field_highwire_adjunct_files/3/ejhpharm-2021-002803supp004_data_supplement.pdf)

Supplemental figure 4 Begg's test of ratio risk on overall response rate.

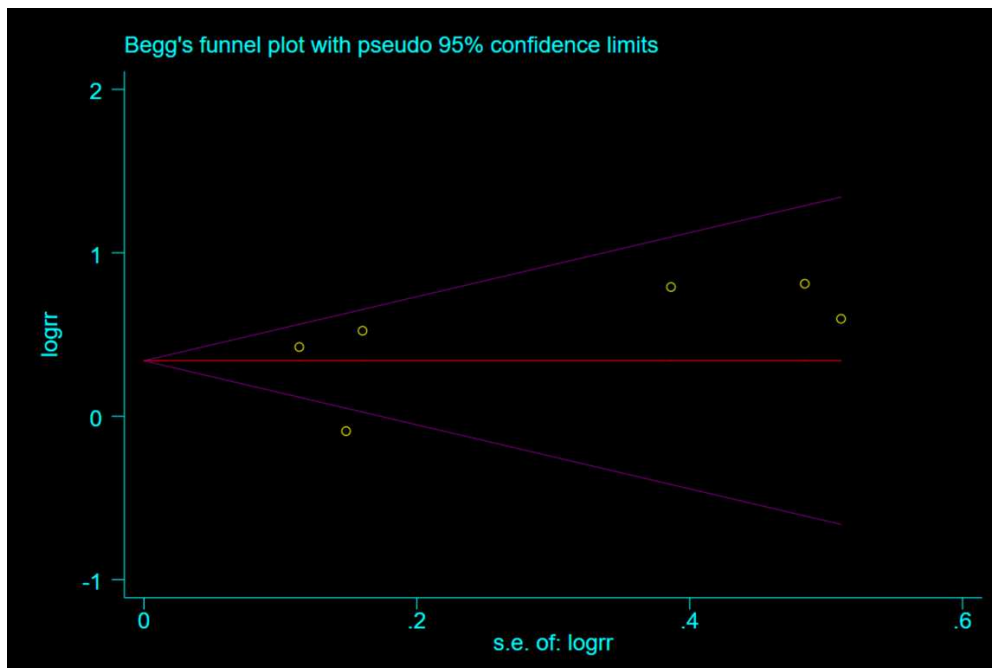

Supplement: ejhpharm-2021-002803supp004_data_supplement.pdf [file ejhpharm-2021-002803supp004_data_supplement.pdf]
